# Supplementary material
Source: PubMed Central journal article supplement (PMC7308520)
Supplement: Supplemental_Material3.pdf [file Supplemental_Material3.pdf]

Table S1: Multiple linear regression in cognitively normal elderly subjects, using OEF (%) as the dependent variable and with HR in the model

| Variables         | $\beta \pm \text{SE}$ | <i>P</i> -value    | $\Delta \text{Model } R^2$ |
|-------------------|-----------------------|--------------------|----------------------------|
| Age               | $0.31 \pm 0.13$       | 0.02               | 0.13                       |
| EtCO <sub>2</sub> | $-1.17 \pm 0.19$      | $3 \times 10^{-6}$ | 0.49                       |
| HR                | $-0.21 \pm 0.08$      | 0.02               | 0.09                       |

$\beta$ : standardized beta coefficient; SE: standardized error.

Table S2: Multiple linear regression in cognitively normal elderly subjects, using OEF (%) as the dependent variable and with DBP in the model

| Variables         | $\beta \pm \text{SE}$ | <i>P</i> -value    | $\Delta \text{Model } R^2$ |
|-------------------|-----------------------|--------------------|----------------------------|
| Age               | $0.44 \pm 0.12$       | 0.002              | 0.13                       |
| EtCO <sub>2</sub> | $-1.21 \pm 0.20$      | $4 \times 10^{-6}$ | 0.49                       |
| DBP               | $0.16 \pm 0.07$       | 0.03               | 0.08                       |

$\beta$ : standardized beta coefficient; SE: standardized error.
